# Supplementary material for: XFEL diffraction: developing processing methods to optimize data quality
Source: PubMed Central journal article supplement (PMC4344359; doi:10.1107/s1600577514028203), 2015-01-29
Supplement: s-22-00239-sup1.pdf [file s-22-00239-sup1.pdf]

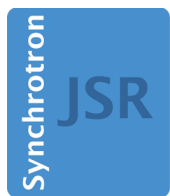

JOURNAL OF  
SYNCHROTRON  
RADIATION

**Volume 22 (2015)**

**Supporting information for article:**

**XFEL diffraction: developing processing methods to optimize data quality**

**Nicholas K. Sauter**

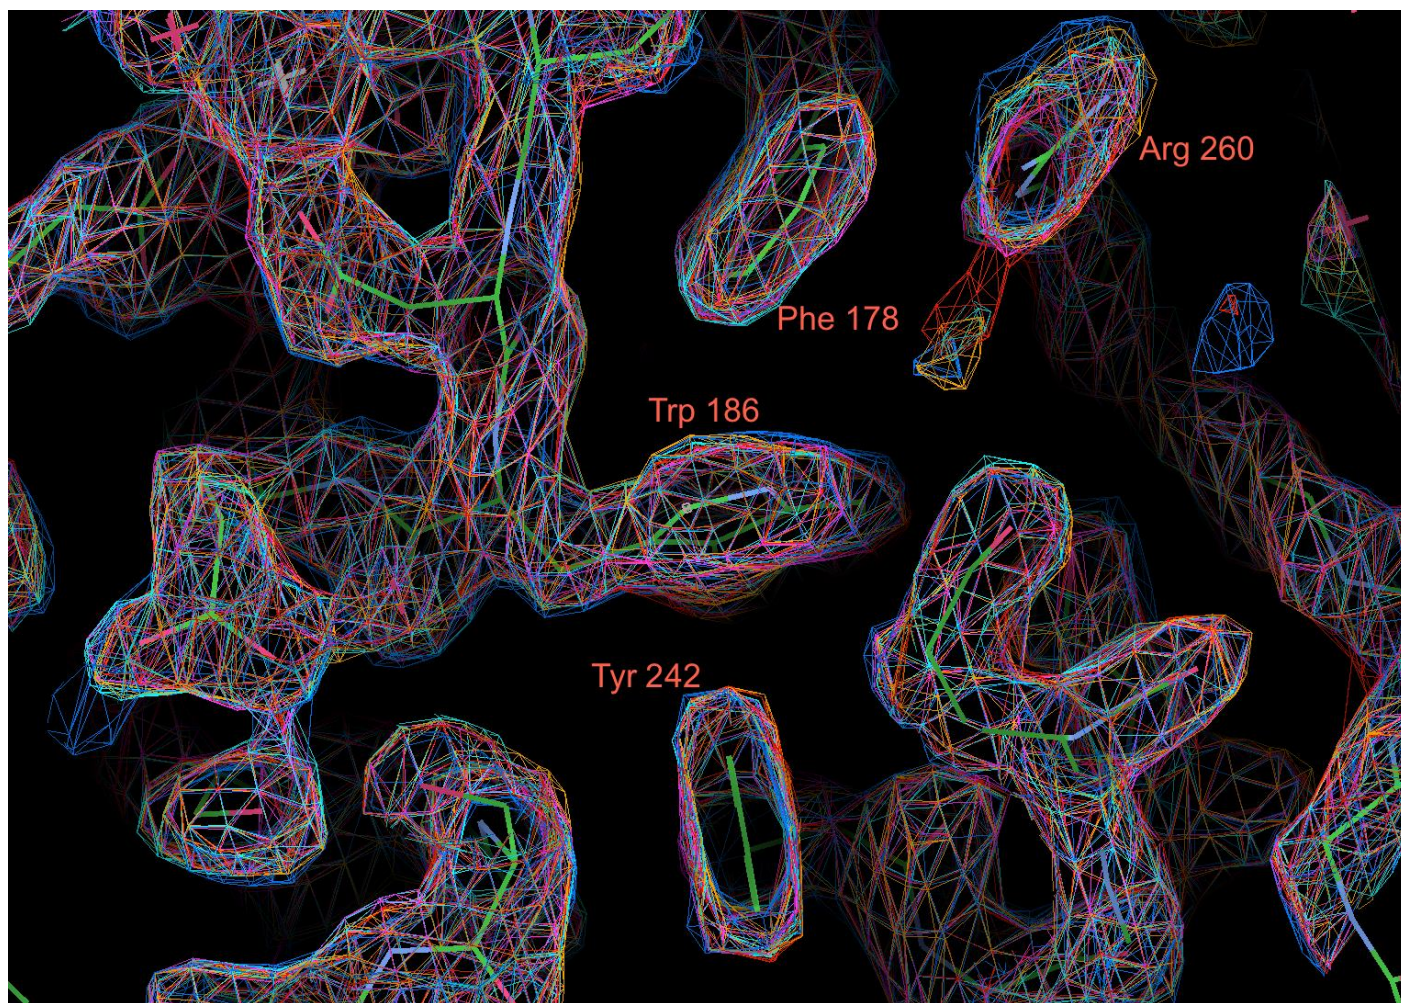

**Figure S1** Figure S1. Likelihood-weighted electron density maps with coefficients  $2mF_o - DF_c$ . The thermolysin molecular model is refined against data processed with protocol 7POST (Table 1), while electron density maps contoured at  $+1.2\sigma$  are illustrated for all protocols: 4 (blue), 6 (cyan), 6F (orange), 7POST (magenta), and 7F,POST (red). Contours surrounding the amino acid sidechains are in approximate agreement across all data-processing protocols, while the details differ in some locations, including those defining the surrounding solvent atoms.
